the authors' dose-effect analysis of nitrous oxide on PONV is very clinically relevant, although not emphasized in the abstract or report. The authors note in the report that nitrous oxide, when used for less than 2 h, did not seem to result in added PONV compared with the non-nitrous arm. This observation is congruent with existing literature,<sup>6</sup> is a randomized comparison that carries with it the methodologic robustness of the original ENIGMA II trial, and has applicability in a wide variety of clinical settings. In closing, we thank the authors for their thorough reanalysis and presentation of the ENIGMA II data for the PONV outcome. This secondary analysis is revealing, but the conclusion that prophylaxis nearly eliminates PONV seems untenable.

### Research Support

Support provided by the University of Saskatchewan, Saskatoon, Canada, for the salaries of Dr. Li, Dr. Balbuena, and Dr. Gamble.

### Competing Interests

The authors declare no competing interests.

**Edmond C. K. Li, M.D., Lloyd D. Balbuena, Ph.D., Jonathan J. Gamble, M.D.** University of Saskatchewan, Saskatoon, Canada (E.C.K.L.). edmond.li@usask.ca

### References

1. Myles PS, Chan MT, Kasza J, Paech MJ, Leslie K, Peyton PJ, Sessler DI, Haller G, Beattie WS, Osborne C, Sneyd JR, Forbes A: Severe nausea and vomiting in the Evaluation of Nitrous Oxide in the Gas Mixture for Anesthesia II Trial. *ANESTHESIOLOGY* 2016; 124:1032–40
2. Sun R, Jia WQ, Zhang P, Yang K, Tian JH, Ma B, Liu Y, Jia RH, Luo XF, Kuriyama A: Nitrous oxide-based techniques versus nitrous oxide-free techniques for general anaesthesia. *Cochrane Database Syst Rev* 2015 ; Nov 6;(11):CD008984
3. Glynn RJ, Schneeweiss S, Stürmer T: Indications for propensity scores and review of their use in pharmacoepidemiology. *Basic Clin Pharmacol Toxicol* 2006; 98:253–9
4. Myles PS, Leslie K, Chan MT, Forbes A, Peyton PJ, Paech MJ, Beattie WS, Sessler DI, Devereaux PJ, Silbert B, Schricker T, Wallace S; ANZCA Trials Group for the ENIGMA-II investigators: The safety of addition of nitrous oxide to general anaesthesia in at-risk patients having major non-cardiac surgery (ENIGMA-II): a randomised, single-blind trial. *Lancet* 2014; 384:1446–54
5. Pannucci CJ, Wilkins EG: Identifying and avoiding bias in research. *Plast Reconstr Surg* 2010; 126:619–25
6. Peyton PJ, Wu CY: Nitrous oxide-related postoperative nausea and vomiting depends on duration of exposure. *ANESTHESIOLOGY* 2014; 120:1137–45

(Accepted for publication March 13, 2017.)

### In Reply:

We thank Li *et al.* for these perspectives. We agree that nonrandomized studies have greater risk of bias and confounding, and the results may therefore be misleading. This certainly applies to studies using propensity-based

**Table 1.** The Incidence (%) and Relative Risk of Postoperative Nausea and Vomiting in Patients Receiving Nitrous Oxide for Major Surgery in the ENIGMA II Trial<sup>1</sup>

|                        | Nitrous Oxide<br>(n = 3,483) | No Nitrous Oxide<br>(n = 3,509) | Relative Risk<br>(95% CI) | P Value |
|------------------------|------------------------------|---------------------------------|---------------------------|---------|
| Overall                | 14.5%                        | 10.8%                           | 1.35<br>(1.19–1.53)       | <0.001  |
| Antiemetic prophylaxis |                              |                                 |                           |         |
| No                     | 16.6%                        | 9.6%                            | 1.75<br>(1.43–2.13)       | <0.001  |
| Yes                    | 13.1%                        | 11.7%                           | 1.12<br>(0.95–1.32)       | 0.18    |

The risk estimate differed according to use of antiemetic prophylaxis; interaction *P* value 0.001.

ENIGMA II = Evaluation of Nitrous Oxide in the Gas Mixture for Anesthesia II.

methods. We would first like to point out that in their letter Li *et al.* state we used propensity score matching. In fact, we actually used inverse probability of treatment weighting. These are distinct methods (although both based on propensity scores) and estimate different quantities (effect of treatment overall *vs.* effect of treatment in the treated).

More importantly however, our comments regarding the risk mitigation associated with antiemetic prophylaxis in patients exposed to nitrous oxide were based not on the secondary analysis referred to by Li *et al.* but in a preplanned secondary analysis of the original large randomized trial.<sup>1</sup> Relevant, expanded details are provided in table 1. The emetogenic effect of nitrous oxide was less apparent in those who received prophylactic antiemetics before the end of surgery compared with those who did not. The interaction *P* value was 0.001, indicating that there was a statistically significant differential effect between these two subgroups. We acknowledge that use of antiemetic prophylaxis was left to the discretion of the attending anesthesiologist, but such use was more likely in those with more risk factors for postoperative nausea and vomiting (PONV; as we reported in our publication).<sup>2</sup> That is, there was a selection bias, but it would underestimate the protective effect of antiemetic prophylaxis because such use was higher in those with greater risk of PONV. We therefore stand by our conclusion that PONV prophylaxis near-eliminates the risk of nitrous oxide-induced severe PONV after major surgery.

### Competing Interests

The authors declare no competing interests.

**Paul S. Myles, D.Sc., F.A.N.Z.C.A., Jessica Kasza, B.Sc., Ph.D.** Monash University, Melbourne, Australia (P.S.M.). p.myles@alfred.org.au

## References

1. Myles PS, Leslie K, Chan MT, Forbes A, Peyton PJ, Paech MJ, Beattie WS, Sessler DI, Devereaux PJ, Silbert B, Schricker T, Wallace S; ANZCA Trials Group for the ENIGMA-II investigators: The safety of addition of nitrous oxide to general anaesthesia in at-risk patients having major non-cardiac surgery (ENIGMA-II): a randomised, single-blind trial. *Lancet* 2014; 384:1446–54
2. Myles PS, Chan MT, Kasza J, Paech MJ, Leslie K, Peyton PJ, Sessler DI, Haller G, Beattie WS, Osborne C, Sneyd JR, Forbes A: Severe nausea and vomiting in the Evaluation of Nitrous Oxide in the Gas Mixture for Anesthesia II Trial. *ANESTHESIOLOGY* 2016; 124:1032–40

(Accepted for publication March 13, 2017.)

## Promoting Sustainable Practices *via* Art

### *To the Editor:*

A few plastic caps from medication vials used for an individual anesthetic may seem insignificant; however, these items accumulate. Using five vials per case for 30,000 cases annually, we waste 150,000 caps per year. At the University of Wisconsin–Madison, we identified an opportunity to divert this commonly discarded material from landfills. Although too small for comingled recycling, caps can be recycled successfully when collected separately. Recycling rates of 20 to 25% are achievable in the operating room without compromising infection control or creating financial constraints.<sup>1</sup>

Forming a multidisciplinary green team is an effective means for promoting sustainable practices.<sup>2,3</sup> To raise

provider awareness of the amount of waste that can be generated in a healthcare setting, our green team initiated a vial cap collection (fig. 1). In addition to recycling caps, we collaborated with our hospital art coordinator to create mosaic artwork from this colorful material (fig. 2). Interest in the art project was greater than anticipated, creating dialogue between staff in all areas of the hospital. Staff have joined together for several art-making events in which participants sort the caps by color and participate in gluing the caps to a large art piece. Educational information about green efforts in the healthcare setting was on display for participants to learn more. Seeing the large collection of small plastics conveys the impact of medical waste. Holding these plastics in their hands to create artwork inspires healthcare providers to look at the bigger picture of the environmental impact of our practice.

### Research Support

Support was provided solely from institutional and/or departmental sources.

### Competing Interests

Dr. Zuegge receives nonclinical time for her role as Medical Director of Sustainability for University of Wisconsin Health. The Department of Planning, Design, and Construction funded the printing, materials, and supplies for, and framing of, the artwork. The other authors declare no competing interests.

**Karin L. Zuegge, M.D., Meghan E. Warren, D.O., Bridget L. Muldowney, M.D., Amanda T. B. Kron, B.S.** University of Wisconsin School of Medicine and Public Health, Madison, Wisconsin (K.L.Z.). zuegge@wisc.edu

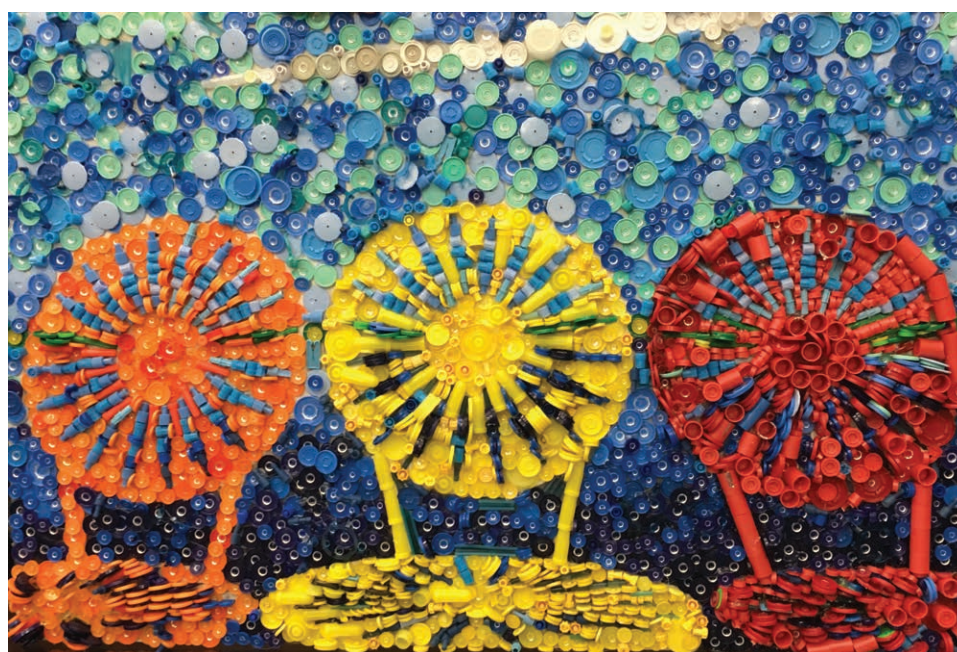

**Fig. 2.** One of the completed artworks now on display in our hospital.
